# Supplementary material for: CHK1 Inhibition Radiosensitizes Head and Neck Cancers to Paclitaxel-Based Chemoradiotherapy
Source: Oxford University Press journal article supplement (doi:10.1158/1535-7163.mct-15-0998), 2016-07-15

**Supplementary Table S1: Patient samples from PredictR-HNC study**

Tumours of the oropharynx collected from patients in the PredictR study. Patients received radiotherapy with or without chemotherapy. Tumour recurrence was noted out to at least 2 years. Patients without recurrence had been followed up 2 - 7.5 years after radiotherapy.

| Patient sample # | T stage | N stage | M stage | HPV status | Recurrence  1 = yes  0 = no | RT Type  1 = primary  2 = adjuvant  3 = palliative | Chemotherapy  1 = none  2 = concomitant  3 = neoadjuvant  4 = neoadjuvant and concomitant |
| --- | --- | --- | --- | --- | --- | --- | --- |
| RMH 116 | 3 | 2b | 0 | + | 1 | 1 | 3 |
| RMH 120 | 3 | 2c | 0 | + | 1 | 1 | 4 |
| RMH 121 | 2 | 0 | 0 | - | 1 | 1 |  |
| RMH 122 | 4 | 1 | 0 | - | 1 | 1 | 4 |
| RMH 132 | 0 | 2b | 0 | + | 0 | 2 | 2 |
| RMH 134 | 3 | 1 | 0 | - | 0 | 2 | 3 |
| RMH 135 | 4 | 1 | 0 | - | 1 | 1 | 3 |
| RMH 141 | 2 | 0 | 0 | + | 0 | 2 | 1 |
| RMH 142 | 3 | 2c | 0 | + | 0 | 1 | 3 |
| RMH 146 | 2 | 2b | 0 | + | 0 | 2 | 2 |
| RMH 147 | 1 | 2b | 0 | + | 0 | 2 | 2 |
| RMH 149 | 4 | 2c | 0 | + | 1 | 1 | 4 |
| RMH 150 | 3 | 1 | 0 | + | 1 | 3 | pall |
| RMH 151 | 3 | 0 | 0 | - | 0 | 1 | 4 |
| RMH 154 | 2 | 0 | 0 | + | 0 | 1 | 1 |
| RMH 155 | 3 | 2b | 0 | + | 1 | 1 | 4 |
| RMH 157 | 2 | 2a | 0 | + | 0 | 1 | 2 |
| RMH 159 | 2 | 2a | 0 | + | 0 | 2 | 2 |
| RMH 163 | 1 | 2b | 0 | + | 0 | 1 | 4 |
| RMH 164 | 1 | 2b | 0 | + | 0 | 2 | 2 |
| RMH 165 | 2 | 2c | 0 | + | 1 | 1 | 1 |
| RMH 167 | 2 | 1 | 0 | + | 0 | 2 | 2 |
| RMH 172 | 3 | 2b | 0 | - | 1 | 1 | 4 |
| RMH 173 | 4 | 3 | 0 | + | 1 | 1 | 4 |
| RMH 175 | 4 | 2b | 0 | + | 1 | 1 | 4 |
| RMH 176 | 2 | 2a | 0 | - | 0 | 1 | 1 |
| RMH 184 | 4 | 2b | 0 | - | 0 | 1 | 4 |
| RMH 187 | 2 | 0 | 0 | - | 0 | 1 | 1 |
| RMH 190 | 2 | 0 | 0 | - | 0 | 1 | 1 |
| RMH 195 | 2 | 2b | 0 | - | 0 | 2 | 1 |
| RMH 196 | 3 | 0 | 0 | - | 1 | 1 | 3 |
| RMH 199 | 4 | 2b | 0 | - | 1 | 1 | 4 |
| RMH 209 | 4 | 0 | 0 | - | 1 | 1 | 2 |

**Supplementary Figure Legends:**

**Supplementary Figure 1: CCT244747 and paclitaxel IC50 determination and analysis of CCT244747 combination therapies**

**(A)** Quantification of IC50 values for CCT244747 (CCT) and paclitaxel (PTX) using MTT assays. Cells were treated with indicated concentrations of the drugs and MTT assays carried out at 72 hours. Cell viability was calculated as a fraction of vehicle treated control cells. **(B)** Quantification of cells in the sub-G1 population at the indicated time-points following radiation (RT) with or without CCT pre-treatment. Cells were fixed, stained with propidium iodide and analysed by flow cytometry. **(C)** Representative images of clonogenic assays. Cells were treated with 0.2 M or 0.7 M CCT one hour before exposure to indicated doses of RT. **(D)** Quantification of cells in the sub-G1 population at the indicated time-points following PTX treatment with or without CCT pre-treatment. Cells were fixed, stained with propidium iodide and analysed by flow cytometry. **(E)** Quantification of cell survival following CCT or PTX monotherapy, or combined treatment, using clonogenic assays. Cells were treated with vehicle, 0.2 M (low dose) or 0.5 M (high dose) CCT244747 (CCT), 1 nM (low dose) or 3 nM (high dose) paclitaxel (PTX) and/or 2 Gy radiation (RT). Surviving fractions (SF) were calculated by comparing with control wells. *, *P* < 0.05; and **, *P* < 0.01.

**Supplementary Figure S2: Investigation of triple therapies using low concentrations of CCT244747 and paclitaxel**

**(A)** Quantification of cell survival after triple therapy using clonogenic assays. Cells were treated with vehicle, 0.2 M CCT244747 (CCT), 1 nM paclitaxel (PTX) and/or 2 Gy radiation (RT) according to schedule 1 or 2. Surviving fractions (SF) were calculated by comparing with control wells. **(B)** Quantification of the SF when normalising for drug effect. *, *P* < 0.05; **, *P* < 0.01; and ***, *P* < 0.001.

**Supplementary Figure S3: HN5 cells exhibit an early increase in the S phase population**

**(A)** Confocal analysis of HN4 and HN5 cells treated with CCT244747 (CCT) 1 hour before treatment with paclitaxel (PTX) and 6 hours before 4 Gy of radiation (RT). Cells were fixed and stained with anti-H2AX antibody (green) to detect sustained DNA DSBs. Cells were co-stained with anti-tubulin antibody (red) and counterstained with DAPI (blue) to distinguish nuclear morphology. Representative images from one experimental repeat of cells fixed and stained at 48 hours are shown. Scale bar = 50 m. **(B)** Quantification of the S phase population of cells following triple therapy according to schedule 2. Cells were fixed at 24 and 48 hours, stained with propidium iodide and analysed by flow cytometry. *, *P* < 0.05.

**Supplementary Figure S4: High CHK1 and p-CHK1 cytoplasmic staining correlate with recurring HPV+ head and neck tumours**

**(A)** Analysis of protein expression in HN4 and HN5 cells 48 hours after triple therapy according to schedule 2 using an apoptosis array. Fold changes were calculated by comparing to vehicle treated controls. **(B)** Quantification of CHK1 and p-CHK1 cytoplasmic staining by immunohistochemistry in HPV+ and HPV- HNSCC samples obtained from patients in the PredictR-HNC strudy. **(C)** Quantification of p-ATM, Ki67 and Survivin expression in tumour samples described in (B). *, *P* < 0.05; and **, *P* < 0.01.

**Supplementary Figure S5: High CHK1, p-CHK1 and p-ATM expression correlate with recurring tumours**

Representative images of tumour samples taken from HPV+ HNSCC patients in the PredictR-HNC study stained with CHK1, p-CHK1, p-ATM, Survivin and Ki67. Scale bar = 100 M.

**Supplementary Figure S6: The HPV+ recurring cell line SCC090 is radioresistant, exhibits strong CHK1 activation after exposure to radiation, and is highly sensitive to triple therapy**

**(A)** Quantification of cell survival after varying doses of radiation using clonogenic assays. Cells were treated with 0, 1, 2 or 4 Gy radiation (RT) and surviving fractions (SF) calculated by comparing with untreated (0 Gy) wells. **(B)** Western blot analysis of SCC090 cells (compared with HN4 cells) following exposure to 10 Gy of radiation (RT). CHK1 activity was determined by blotting for p-CHK1. The mitotic population was also analysed by blotting for p-HH3. Expression of -actin provided a loading control. **(C)** Quantification of IC50 values for CCT244747 (CCT) in SCC090 cells using MTT assays. Assays were repeated in HN4 and HN5 cells for direct comparison. Cells were treated with indicated concentrations of CCT244747 and MTT assays carried out at 72 hours. Cell viability was calculated as a fraction of vehicle treated control cells. **(D)** Quantification of cell survival after triple therapy using clonogenic assays. Cells were treated with vehicle, 0.2 M (low dose) or 0.5 M (high dose) CCT, 1 nM (low dose) or 3 nM (high dose) PTX and/or 2 Gy RT according to schedule 2. Surviving fractions (SF) were calculated by comparing treated wells with control wells and normalising for drug effects. **(E)** Quantification of cell viability after triple therapy using long-term (144 hours) MTT assays. Cells were treated with vehicle, 0.1 M CCT, 1nM PTX and/or 2 Gy RT according to schedule 2. Cell viability was calculated as a fraction of control cells. *, *P* < 0.05; **, *P* < 0.01; ***, *P* < 0.001; and ****, *P* < 0.0001


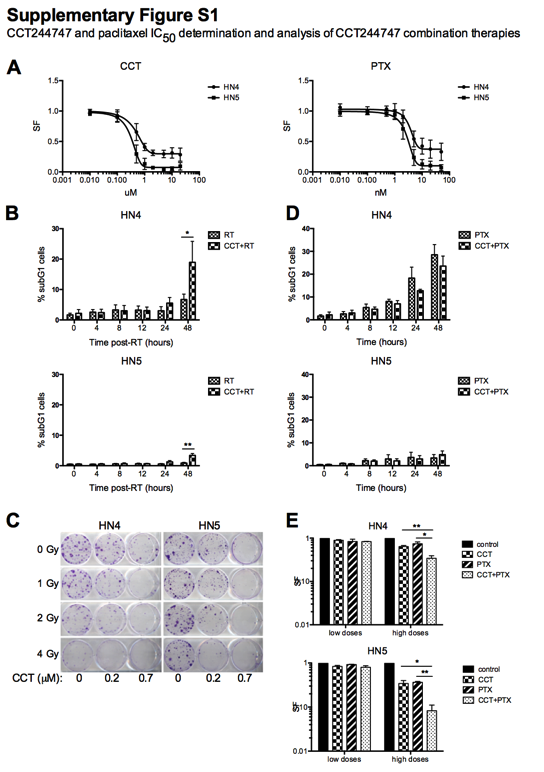


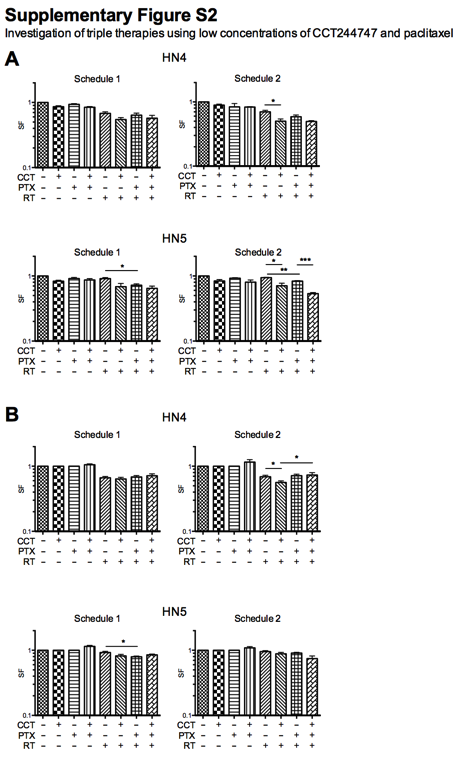


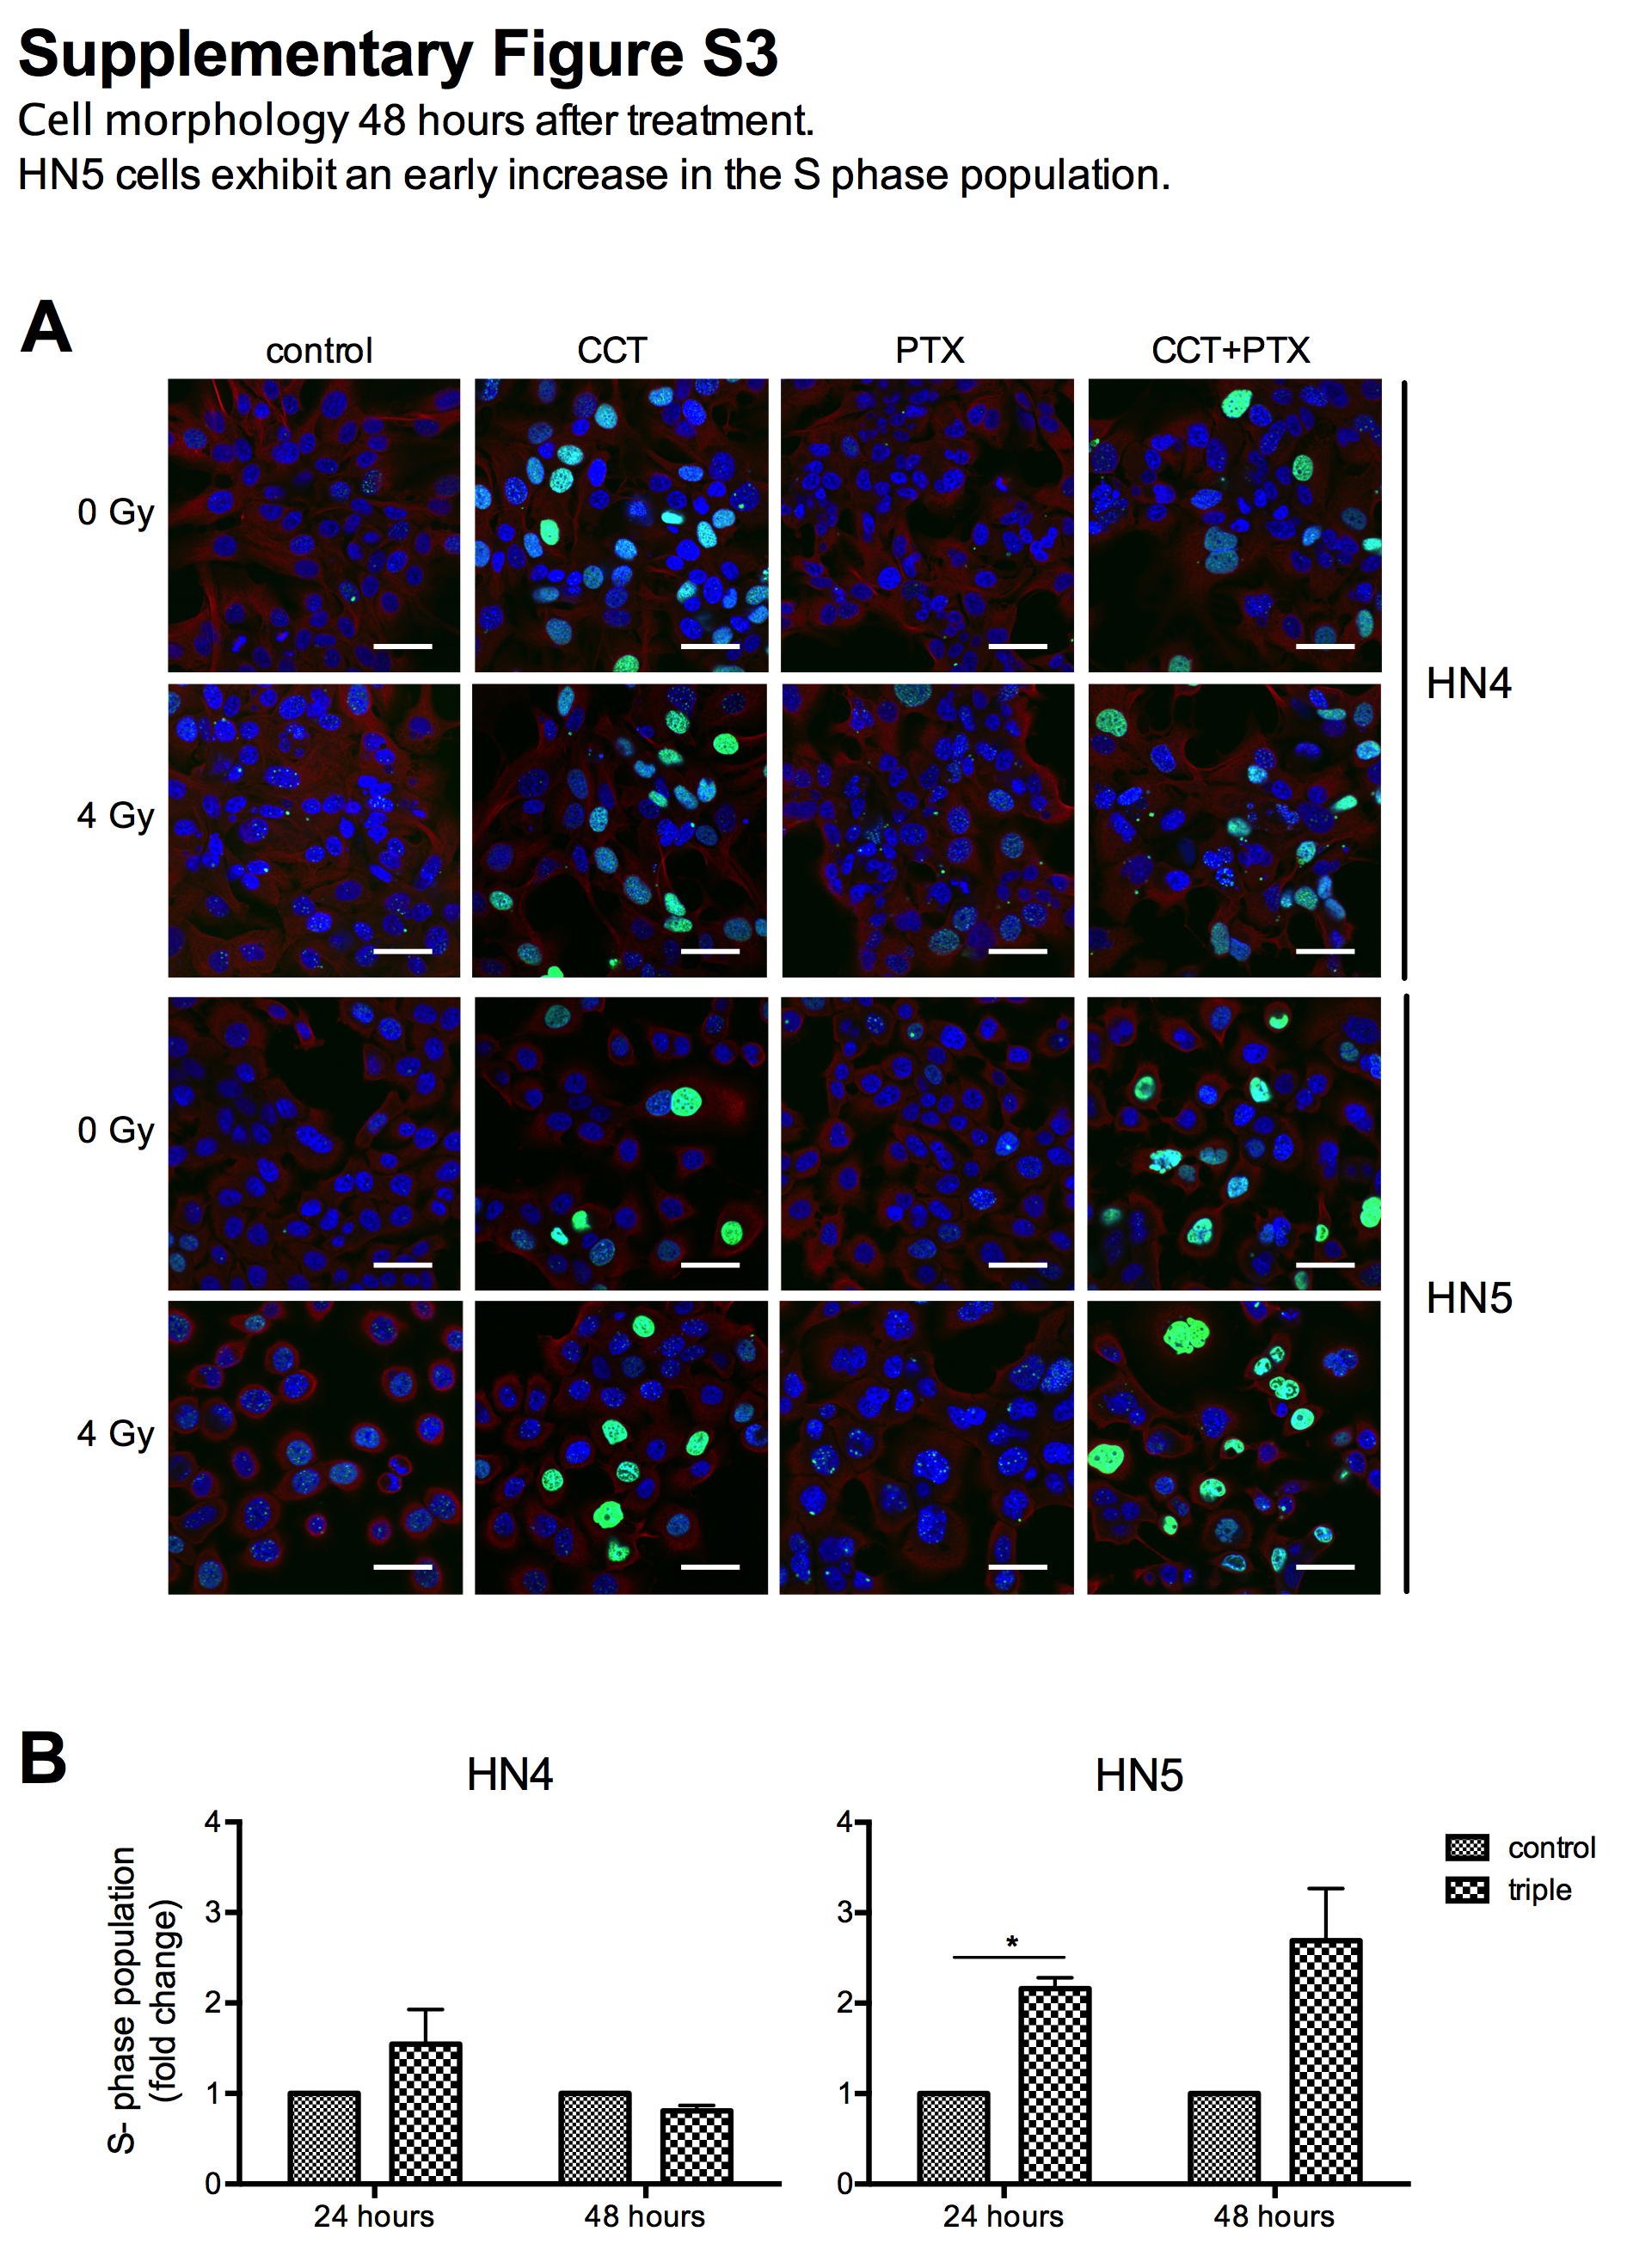


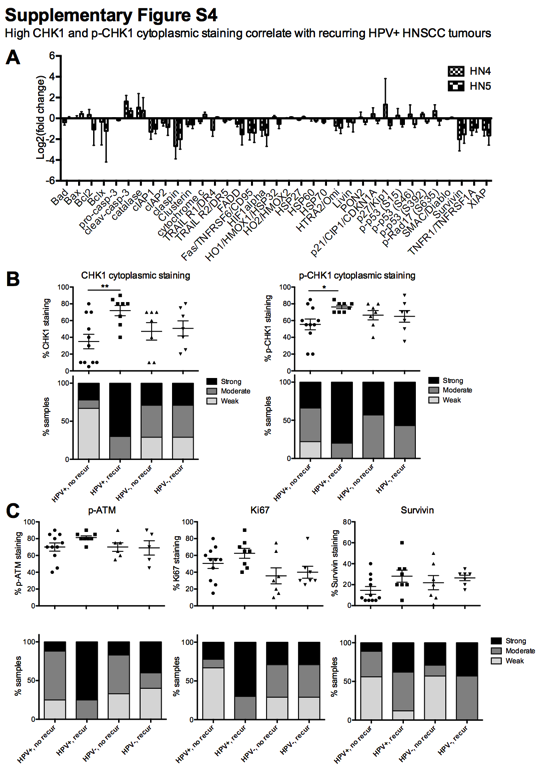


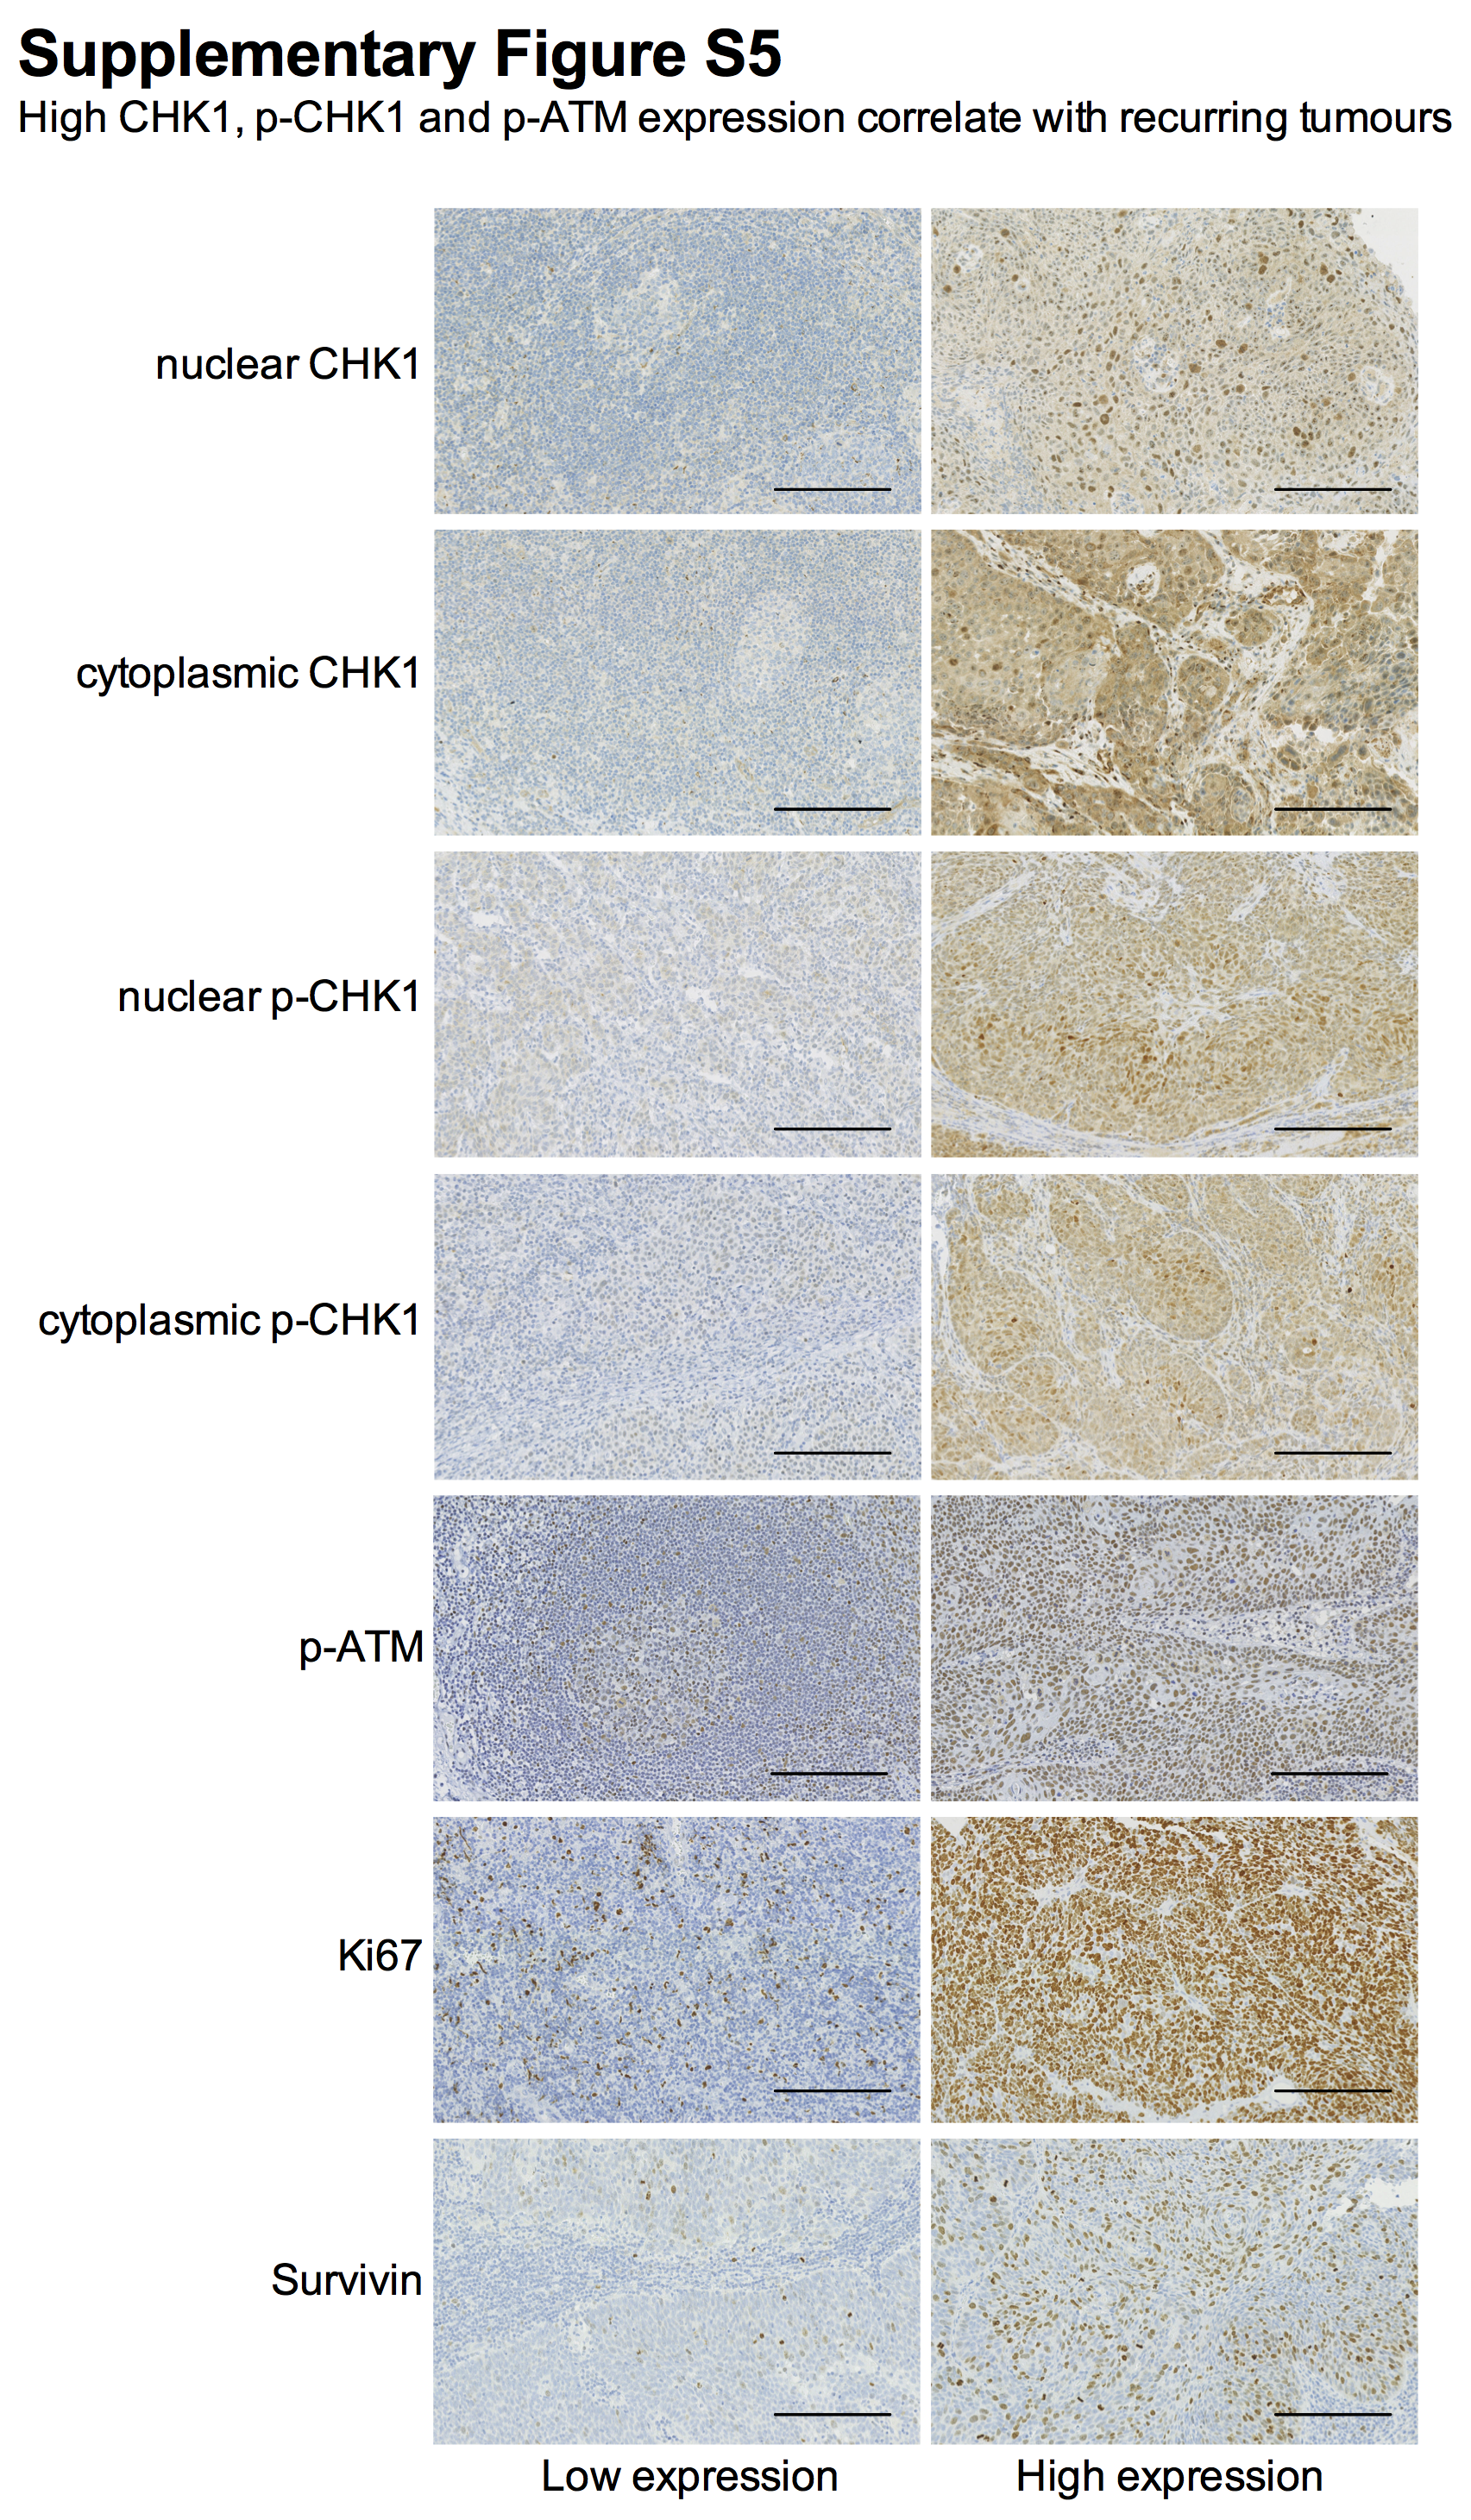


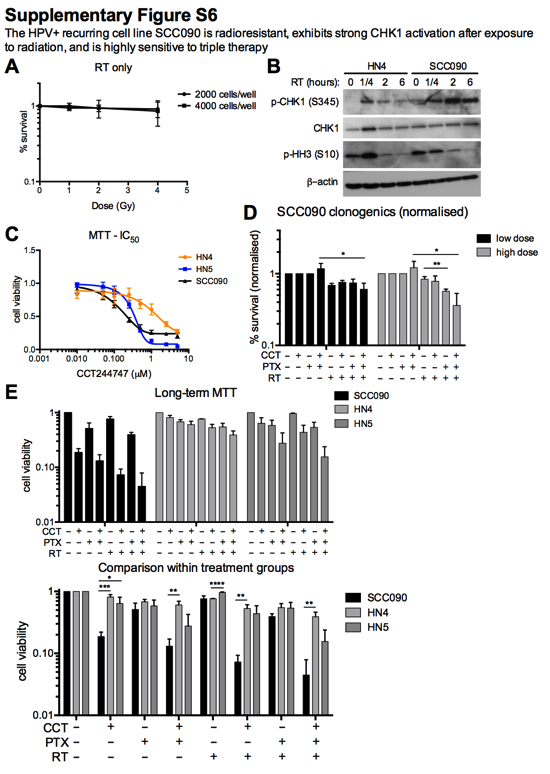

Supplement: 15357163mct150998-sup-159752_2_supp_3528893_58cnqp.docx [file 15357163mct150998-sup-159752_2_supp_3528893_58cnqp.docx]
